# Supplementary material for: Perceptions Toward a Smoking Cessation App Targeting LGBTQ+ Youth and Young Adults: A Qualitative Framework Analysis of Focus Groups
Source: PubMed Central journal article supplement (PMC5135733; doi:10.2196/publichealth.6188), 2016-11-18
Supplement: publichealth_v2i2e165_app2.pdf [file publichealth_v2i2e165_app2.pdf]

Demographic and smoking characteristics of focus group participants (N=204).

| <b>CHARACTERISTICS</b>                     | <b>N (%)</b> | <b>CHARACTERISTICS</b>                                  | <b>N (%)</b> |
|--------------------------------------------|--------------|---------------------------------------------------------|--------------|
| <b>AGE (YEAR)</b>                          |              | <b>Have you smoked 100 cigarettes?</b>                  |              |
| 16-17                                      | 18 (8.8)     | Yes                                                     | 186 (91.2)   |
| 18-29                                      | 186 (91.2)   | No                                                      | 16 (7.8)     |
| Total                                      | 204 (100.0)  | Missing                                                 | 2 (1.0)      |
| Mean age                                   | 23           | Total                                                   | 204 (100.0)  |
| <b>GENDER</b>                              |              | <b>Ethnicity</b>                                        |              |
| Female                                     | 85 (39.0)    | Aboriginal                                              | 25 (10.4)    |
| Male                                       | 58 (26.6)    | Black/African/Caribbean                                 | 46 (19.1)    |
| Trans female                               | 8 (3.7)      | Central Asian                                           | 1 (0.4)      |
| Trans male                                 | 15 (6.9)     | East/South East Asian                                   | 16 (6.6)     |
| Two-spirit                                 | 9 (4.1)      | Latin America                                           | 12 (5.0)     |
| Queer                                      | 32 (14.7)    | Middle Eastern                                          | 7 (2.9)      |
| Intersex                                   | 1 (0.5)      | South Asian                                             | 11 (4.6)     |
| Other                                      | 10 (4.6)     | White                                                   | 115 (47.7)   |
| Total <sup>a</sup>                         | 218 (100.0)  | Other                                                   | 8 (3.3)      |
|                                            |              | Total <sup>a</sup>                                      | 241 (100.0)  |
| <b>SEXUAL ORIENTATION</b>                  |              | <b>Education</b>                                        |              |
| Lesbian                                    | 27 (12.9)    | Some high school (currently enrolled)                   | 25 (12.3)    |
| Gay                                        | 54 (25.8)    | Some high school (not currently enrolled/not completed) | 21 (10.3)    |
| Bisexual                                   | 57 (27.3)    | Completed high school with diploma                      | 78 (38.2)    |
| Queer                                      | 51 (24.4)    | College degree <sup>c</sup>                             | 35 (17.2)    |
| Intersex                                   | 5 (2.4)      | University degree <sup>c</sup>                          | 40 (19.6)    |
| Pansexual <sup>b</sup>                     | 10 (4.8)     | Graduate degree (Masters or PhD)                        | 4 (2.0)      |
| Other                                      | 5 (2.4)      | Missing                                                 | 1 (0.5)      |
| Total <sup>a</sup>                         | 209 (100.0)  | Total                                                   | 204 (100.0)  |
| <b>HOW SOON AFTER WAKING DO YOU SMOKE?</b> |              | <b>Housing</b>                                          |              |
| <5 minutes                                 | 25 (12.3)    | Living with parent                                      | 59 (25.2)    |
| 6–30 minutes                               | 50 (24.5)    | Rented or owned                                         | 118 (50.4)   |
| 31–60 minutes                              | 31 (15.2)    | Homeless                                                | 12 (5.1)     |
| >60 minutes                                | 64 (31.4)    | Social housing                                          | 17 (7.3)     |
| I don't smoke                              | 17 (8.3)     | Couchsurfing                                            | 25 (10.7)    |
| Missing                                    | 17 (8.3)     | University/College residence                            | 3 (1.3)      |
| Total                                      | 204 (100.0)  | Total <sup>a</sup>                                      | 234 (100.0)  |
| <b>CURRENTLY SMOKE?</b>                    |              | <b>Years lived in Canada</b>                            |              |
| Daily                                      | 113 (55.4)   | 0-1 years                                               | 12 (5.9)     |
| Occasionally                               | 58 (28.4)    | 2-5 years                                               | 17 (8.3)     |
| Recent quitter                             | 30 (14.7)    | 6-10 years                                              | 12 (5.9)     |
| Missing                                    | 3 (1.5)      | Over 10 years                                           | 163 (79.9)   |
| Total                                      | 204 (100.0)  | Total                                                   | 204 (100.0)  |
| <b>INTEND TO QUIT IN THE NEXT 30 DAYS</b>  |              | <b>City</b>                                             |              |
| Yes                                        | 53 (26.0)    | Toronto                                                 | 156 (76.5)   |
| No                                         | 32 (15.7)    | Ottawa                                                  | 43 (21.1)    |
| Don't know                                 | 89 (43.6)    | Other                                                   | 2 (1.0)      |
| N/A                                        | 13 (6.4)     | Missing                                                 | 3 (1.5)      |
| Missing                                    | 17 (8.3)     | Total                                                   | 204 (100.0)  |
| Total                                      | 204 (100.0)  |                                                         |              |

<sup>a</sup>The total number reflects the number of responses; some participants selected more than one response.

<sup>b</sup>Including gray-A pansexual and pansexual demisexual.

<sup>c</sup>Those who said “some college” or “some university” were recoded into “college” or “university.”
